# Supplementary material for: Trends in induction of labour and associated co-morbidities and demographics in Queensland, Australia from 2001 to 2020: a population-based study
Source: Springer Nature journal article supplement (doi:10.1186/s12884-025-07379-5), 2025-03-26
Supplement: MOESM1 [file 12884_2025_7379_MOESM1_ESM.pdf]

**Table 1: Categorisation of ICD-10 codes (12th Edition) of main indication for induction of labour for all women**

| <b>ICD 10 code</b> | <b>ICD 10 category</b>                                                              | <b>Induction of labour indication category</b> |
|--------------------|-------------------------------------------------------------------------------------|------------------------------------------------|
| A (all codes)      | Infectious and parasitic diseases                                                   | Non obstetric medical                          |
| B (all codes)      | Infectious and parasitic diseases                                                   | Non obstetric medical                          |
| C (all codes)      | Neoplastic                                                                          | Non obstetric medical                          |
| D (all codes)      | Neoplastic                                                                          | Non obstetric medical                          |
| E (all codes)      | Endocrine, nutritional and metabolic diseases                                       | Non obstetric medical                          |
| E6613              | Endocrine, nutritional and metabolic diseases                                       | Obstetric medical                              |
| E6623              | Endocrine, nutritional and metabolic diseases                                       | Obstetric medical                              |
| E668               | Endocrine, nutritional and metabolic diseases                                       | Obstetric medical                              |
| E669               | Endocrine, nutritional and metabolic diseases                                       | Obstetric medical                              |
| E6690              | Endocrine, nutritional and metabolic diseases                                       | Obstetric medical                              |
| E6691              | Endocrine, nutritional and metabolic diseases                                       | Obstetric medical                              |
| E6692              | Endocrine, nutritional and metabolic diseases                                       | Obstetric medical                              |
| E6693              | Endocrine, nutritional and metabolic diseases                                       | Obstetric medical                              |
| F (all codes)      | Mental and behavioural disorders                                                    | Non obstetric medical                          |
| G (all codes)      | Diseases of the nervous system                                                      | Non obstetric medical                          |
| H (all codes)      | Diseases of the eye and adnexa and ear                                              | Non obstetric medical                          |
| I (all codes)      | Diseases of the circulatory system                                                  | Non obstetric medical                          |
| J (all codes)      | Diseases of the respiratory system                                                  | Non obstetric medical                          |
| K (all codes)      | Diseases of the digestive system                                                    | Non obstetric medical                          |
| L (all codes)      | Diseases of the skin and subcutaneous tissue                                        | Non obstetric medical                          |
| M (all codes)      | Diseases of the musculoskeletal system and connective tissue                        | Non obstetric medical                          |
| N (all codes)      | Diseases of the genitourinary system                                                | Non obstetric medical                          |
| O001               | Tubal pregnancy                                                                     | Obstetric medical                              |
| O028               | Other specified abnormal products of conception                                     | Obstetric medical                              |
| O048               | Medical abortion, complete or unspecified, with other and unspecified complications | Obstetric medical                              |
| O077               | Other and unspecified failed attempted abortion, complicated by embolism            | Obstetric medical                              |
| O10                | Pre-existing hypertension in pregnancy, childbirth and the puerperium               | Hypertensive disorder (include PE & Eclampsia) |

|      |                                                                                                |                                                |
|------|------------------------------------------------------------------------------------------------|------------------------------------------------|
| O100 | Pre-existing essential hypertension complicating pregnancy, childbirth and the puerperium      | Hypertensive disorder (include PE & Eclampsia) |
| O102 | Pre-existing hypertensive kidney disease complicating pregnancy, childbirth and the puerperium | Hypertensive disorder (include PE & Eclampsia) |
| O104 | Pre-existing secondary hypertension complicating pregnancy, childbirth and the puerperium      | Hypertensive disorder (include PE & Eclampsia) |
| O11  | Pre-eclampsia superimposed on chronic hypertension                                             | Hypertensive disorder (include PE & Eclampsia) |
| O120 | Gestational oedema                                                                             | Obstetric medical                              |
| O121 | Gestational proteinuria                                                                        | Obstetric medical                              |
| O122 | Gestational oedema with proteinuria                                                            | Obstetric medical                              |
| O13  | Gestational [pregnancy-induced] hypertension                                                   | Hypertensive disorder (include PE & Eclampsia) |
| O140 | Mild to moderate pre-eclampsia                                                                 | Hypertensive disorder (include PE & Eclampsia) |
| O141 | Severe pre-eclampsia                                                                           | Hypertensive disorder (include PE & Eclampsia) |
| O142 | HELLP syndrome                                                                                 | Hypertensive disorder (include PE & Eclampsia) |
| O149 | Pre-eclampsia, unspecified                                                                     | Hypertensive disorder (include PE & Eclampsia) |
| O150 | Eclampsia in pregnancy                                                                         | Hypertensive disorder (include PE & Eclampsia) |
| O151 | Eclampsia in labour                                                                            | Hypertensive disorder (include PE & Eclampsia) |
| O159 | Eclampsia unspecified as to time period                                                        | Hypertensive disorder (include PE & Eclampsia) |
| O16  | Eclampsia in labour                                                                            | Hypertensive disorder (include PE & Eclampsia) |
| O200 | Threatened abortion                                                                            | Obstetric medical                              |
| O208 | Other haemorrhage in early pregnancy                                                           | Obstetric medical                              |
| O209 | Haemorrhage in early pregnancy, unspecified                                                    | Obstetric medical                              |
| O210 | Hyperemesis gravidarum                                                                         | Obstetric medical                              |

|       |                                                                                                               |                   |
|-------|---------------------------------------------------------------------------------------------------------------|-------------------|
| O211  | Hyperemesis gravidarum with metabolic disturbance                                                             | Obstetric medical |
| O212  | Vomiting in late pregnancy                                                                                    | Obstetric medical |
| O218  | Other vomiting complicating pregnancy                                                                         | Obstetric medical |
| O219  | Vomiting in pregnancy, not elsewhere classified                                                               | Obstetric medical |
| O220  | Varicose veins of lower extremity in pregnancy                                                                | Obstetric medical |
| O221  | Genital varices in pregnancy                                                                                  | Obstetric medical |
| O222  | Superficial thrombophlebitis in pregnancy                                                                     | Obstetric medical |
| O223  | Deep phlebothrombosis in pregnancy                                                                            | Obstetric medical |
| O224  | Haemorrhoids in pregnancy                                                                                     | Obstetric medical |
| O229  | Venous condition in pregnancy                                                                                 | Obstetric medical |
| O230  | Infections of kidney in pregnancy                                                                             | Obstetric medical |
| O233  | Infections of other parts of urinary tract in pregnancy                                                       | Obstetric medical |
| O234  | Unspecified infection of urinary tract in pregnancy                                                           | Obstetric medical |
| O235  | Infections of the genital tract in pregnancy                                                                  | Obstetric medical |
| O240  | Pre-existing Type 1 diabetes mellitus in pregnancy, childbirth and the puerperium                             | Diabetes          |
| O241  | Pre-existing Type 2 diabetes mellitus in pregnancy, childbirth and the puerperium                             | Diabetes          |
| O2411 | Pre-existing diabetes mellitus, Type 2, in pregnancy, non-insulin treated                                     | Diabetes          |
| O2412 | Pre-existing Type 2 diabetes mellitus in pregnancy, childbirth and the puerperium, insulin treated            | Diabetes          |
| O2413 | Pre-existing Type 2 diabetes mellitus in pregnancy, childbirth and the puerperium, oral hypoglycaemic therapy | Diabetes          |
| O2414 | Pre-existing Type 2 diabetes mellitus in pregnancy, childbirth and the puerperium, other                      | Diabetes          |
| O2419 | Pre-existing Type 2 diabetes mellitus in pregnancy, childbirth and the puerperium, unspecified                | Diabetes          |
| O2422 | Pre-existing other specified diabetes mellitus in pregnancy, childbirth and the puerperium, insulin treated   | Diabetes          |
| O243  | Pre-existing unspecified diabetes mellitus, in pregnancy, childbirth and the puerperium                       | Diabetes          |
| O2431 | Pre-existing diabetes mellitus, unspecified, in pregnancy, non-insulin treated                                | Diabetes          |

|       |                                                                                                                             |                   |
|-------|-----------------------------------------------------------------------------------------------------------------------------|-------------------|
| O2432 | Pre-existing unspecified diabetes mellitus in pregnancy, childbirth and the puerperium, Diabetes insulin treated            |                   |
| O2433 | Pre-existing unspecified diabetes mellitus in pregnancy, childbirth and the puerperium, Diabetes oral hypoglycaemic therapy |                   |
| O2434 | Pre-existing unspecified diabetes mellitus in pregnancy, childbirth and the puerperium, Diabetes other                      |                   |
| O2439 | Pre-existing unspecified diabetes mellitus in pregnancy, childbirth and the puerperium, Diabetes unspecified                |                   |
| O244  | Diabetes mellitus arising during pregnancy                                                                                  | Diabetes          |
| O2441 | Diabetes mellitus arising at or after 24 weeks gestation, non-insulin treated                                               | Diabetes          |
| O2442 | Diabetes mellitus arising during pregnancy, insulin treated                                                                 | Diabetes          |
| O2443 | Diabetes mellitus arising during pregnancy, oral hypoglycaemic therapy                                                      | Diabetes          |
| O2444 | Diabetes mellitus arising during pregnancy, other                                                                           | Diabetes          |
| O2449 | Diabetes mellitus arising during pregnancy, unspecified                                                                     | Diabetes          |
| O2499 | Diabetes mellitus in pregnancy, childbirth and the puerperium, unspecified onset, unspecified                               | Diabetes          |
| O25   | Malnutrition in pregnancy, childbirth and the puerperium                                                                    | Obstetric medical |
| O260  | Excessive weight gain in pregnancy                                                                                          | Obstetric medical |
| O261  | Low weight gain in pregnancy                                                                                                | Obstetric medical |
| O264  | Pemphigoid gestationis [herpes gestationis]                                                                                 | Obstetric medical |
| O266  | Liver disorders in pregnancy, childbirth and the puerperium                                                                 | Obstetric medical |
| O267  | Subluxation of symphysis (pubis) in pregnancy, childbirth and the puerperium                                                | Obstetric medical |
| O2681 | Kidney disorders in pregnancy, childbirth and the puerperium                                                                | Obstetric medical |
| O2682 | Carpal tunnel syndrome in pregnancy                                                                                         | Obstetric medical |
| O2683 | Neuralgia in pregnancy                                                                                                      | Obstetric medical |
| O2688 | Other specified pregnancy-related conditions                                                                                | Obstetric medical |
| O280  | Abnormal haematological finding on antenatal screening of mother                                                            | Obstetric medical |
| O281  | Abnormal biochemical finding on antenatal screening of mother                                                               | Obstetric medical |
| O283  | Abnormal ultrasonic finding on antenatal screening of mother                                                                | Obstetric medical |
| O285  | Abnormal chromosomal and genetic finding on antenatal screening of mother                                                   | Obstetric medical |
| O288  | Other abnormal findings on antenatal screening of mother                                                                    | Obstetric medical |

|      |                                                                                |                         |
|------|--------------------------------------------------------------------------------|-------------------------|
| O289 | Abnormal finding on antenatal screening of mother, unspecified                 | Obstetric medical       |
| O294 | Spinal and epidural anaesthesia-induced headache during pregnancy              | Obstetric medical       |
| O311 | Continuing pregnancy after abortion of one fetus or more                       | Obstetric medical       |
| O320 | Maternal care for unstable lie                                                 | Obstetric medical       |
| O321 | Maternal care for breech presentation                                          | Obstetric medical       |
| O322 | Maternal care for transverse and oblique lie                                   | Obstetric medical       |
| O323 | Maternal care for face, brow and chin presentation                             | Obstetric medical       |
| O324 | Maternal care for high head at term                                            | Obstetric medical       |
| O325 | Maternal care for multiple gestation with malpresentation of one fetus or more | Obstetric medical       |
| O326 | Maternal care for compound presentation                                        | Obstetric medical       |
| O328 | Maternal care for other malpresentation of fetus                               | Obstetric medical       |
| O329 | Maternal care for malpresentation of fetus, unspecified                        | Obstetric medical       |
| O330 | Maternal care for disproportion due to deformity of maternal pelvic bones      | Obstetric medical       |
| O331 | Maternal care for disproportion due to generally contracted pelvis             | Obstetric medical       |
| O333 | Maternal care for disproportion due to outlet contraction of pelvis            | Pre labour complication |
| O335 | Maternal care for disproportion due to unusually large fetus                   | LGA                     |
| O337 | Maternal care for disproportion due to other fetal deformities                 | Fetal indications       |
| O338 | Maternal care for disproportion of other origin                                | Obstetric medical       |
| O339 | Maternal care for disproportion, unspecified                                   | Obstetric medical       |
| O340 | Maternal care for congenital malformation of uterus                            | Obstetric medical       |
| O341 | Maternal care for tumour of corpus uteri                                       | Obstetric medical       |
| O342 | Maternal care due to uterine scar from previous surgery                        | Obstetric medical       |
| O343 | Maternal care for cervical incompetence                                        | Obstetric medical       |
| O344 | Maternal care for other abnormalities of cervix                                | Obstetric medical       |
| O345 | Maternal care for other abnormalities of gravid uterus                         | Obstetric medical       |
| O346 | Maternal care for abnormality of vagina                                        | Obstetric medical       |
| O348 | Maternal care for other abnormalities of pelvic organs                         | Obstetric medical       |
| O350 | Maternal care for (suspected) central nervous system malformation in fetus     | Fetal indications       |
| O351 | Maternal care for (suspected) chromosomal abnormality in fetus                 | Fetal indications       |
| O352 | Maternal care for (suspected) hereditary disease in fetus                      | Fetal indications       |
| O353 | Maternal care for (suspected) damage to fetus from viral disease in mother     | Fetal indications       |
| O354 | Maternal care for (suspected) damage to fetus from alcohol                     | Fetal indications       |

|       |                                                                           |                           |
|-------|---------------------------------------------------------------------------|---------------------------|
| O355  | Maternal care for (suspected) damage to fetus by drugs                    | Fetal indications         |
| O357  | Maternal care for (suspected) damage to fetus by other medical procedures | Fetal indications         |
| O358  | Maternal care for other (suspected) fetal abnormality and damage          | Fetal indications         |
| O359  | Maternal care for (suspected) fetal abnormality and damage, unspecified   | Fetal indications         |
| O360  | Maternal care for rhesus isoimmunisation                                  | Fetal indications         |
| O361  | Maternal care for other isoimmunisation                                   | Fetal indications         |
| O362  | Maternal care for hydrops fetalis                                         | Fetal indications         |
| O363  | Maternal care for signs of fetal hypoxia                                  | Fetal indications         |
| O365  | Maternal care for poor fetal growth                                       | SGA                       |
| O366  | Maternal care for excessive fetal growth                                  | LGA                       |
| O368  | Maternal care for other specified fetal problems                          | Decreased fetal movements |
| O369  | Maternal care for fetal problem, unspecified                              | Fetal indications         |
| O40   | Polyhydramnios                                                            | Fetal indications         |
| O410  | Oligohydramnios                                                           | Fetal indications         |
| O411  | Infection of amniotic sac and membranes                                   | Fetal indications         |
| O418  | Other specified disorders of amniotic fluid and membranes                 | Fetal indications         |
| O419  | Disorder of amniotic fluid and membranes, unspecified                     | Fetal indications         |
| O420  | Premature rupture of membranes, onset of labour within 24 hours           | TPROM                     |
| O4211 | Premature rupture of membranes, onset of labour between 1-7 days later    | TPROM                     |
| O4212 | Premature rupture of membranes, onset of labour more than 7 days later    | TPROM                     |
| O422  | Premature rupture of membranes, labour delayed by therapy                 | TPROM                     |
| O429  | Premature rupture of membranes, unspecified                               | TPROM                     |
| O430  | Placental transfusion syndromes                                           | Fetal indications         |
| O431  | Malformation of placenta                                                  | Fetal indications         |
| O432  | Morbidly adherent placenta                                                | Pre labour complication   |
| O438  | Other placental disorders                                                 | Pre labour complication   |
| O439  | Placental disorder, unspecified                                           | Pre labour complication   |
| O440  | Placenta praevia specified as without haemorrhage                         | Pre labour complication   |
| O441  | Placenta praevia with haemorrhage                                         | Pre labour complication   |
| O450  | Premature separation of placenta with coagulation defect                  | Pre labour complication   |
| O459  | Premature separation of placenta, unspecified                             | Pre labour complication   |
| O468  | Other antepartum haemorrhage                                              | Pre labour complication   |
| O469  | Antepartum haemorrhage, unspecified                                       | Pre labour complication   |

|       |                                                                                             |                         |
|-------|---------------------------------------------------------------------------------------------|-------------------------|
| O470  | False labour before 37 completed weeks of gestation                                         | Pre labour complication |
| O471  | False labour at or after 37 completed weeks of gestation                                    | Pre labour complication |
| O479  | False labour, unspecified                                                                   | Pre labour complication |
| O48   | Prolonged pregnancy                                                                         | Prolonged pregnancy     |
| O60   | Preterm labour and delivery                                                                 | Pre labour complication |
| O620  | Primary inadequate contractions                                                             | Pre labour complication |
| O622  | Other uterine inertia                                                                       | Pre labour complication |
| O623  | Precipitate labour                                                                          | Pre labour complication |
| O624  | Hypertonic, incoordinate, and prolonged uterine contractions                                | Pre labour complication |
| O630  | Prolonged first stage (of labour)                                                           | Pre labour complication |
| O631  | Prolonged second stage (of labour)                                                          | Pre labour complication |
| O639  | Long labour, unspecified                                                                    | Pre labour complication |
| O645  | Labour and delivery affected by compound presentation                                       | Pre labour complication |
| O660  | Labour and delivery affected by shoulder dystocia                                           | Pre labour complication |
| O662  | Labour and delivery affected by unusually large fetus                                       | LGA                     |
| O665  | Failed application of vacuum extractor and forceps, unspecified                             | Pre labour complication |
| O679  | Intrapartum haemorrhage, unspecified                                                        | Pre labour complication |
| O680  | Labour and delivery complicated by fetal heart rate anomaly                                 | Fetal indications       |
| O681  | Labour and delivery complicated by meconium in amniotic fluid                               | Fetal indications       |
| O682  | Labour and delivery complicated by fetal heart rate anomaly with meconium in amniotic fluid | Fetal indications       |
| O688  | Labour and delivery complicated by other evidence of fetal stress                           | Fetal indications       |
| O689  | Labour and delivery complicated by fetal stress, unspecified                                | Fetal indications       |
| O692  | Labour and delivery complicated by other cord entanglement, with compression                | Fetal indications       |
| O693  | Labour and delivery complicated by short cord                                               | Fetal indications       |
| O695  | Labour and delivery complicated by vascular lesion of cord                                  | Fetal indications       |
| O702  | Third degree perineal laceration during delivery                                            | Pre labour complication |
| O716  | Obstetric damage to pelvic joints and ligaments                                             | Pre labour complication |
| O717  | Obstetric haematoma of pelvis                                                               | Pre labour complication |
| O718  | Other specified obstetric trauma                                                            | Pre labour complication |
| O7182 | Diastasis of recti abdominal muscle in pregnancy or delivery                                | Pre labour complication |
| O740  | Aspiration pneumonitis due to anaesthesia during labour and delivery                        | Pre labour complication |

|       |                                                                                                                                                       |                         |
|-------|-------------------------------------------------------------------------------------------------------------------------------------------------------|-------------------------|
| O748  | Other complications of anaesthesia during labour and delivery                                                                                         | Pre labour complication |
| O750  | Maternal distress during labour and delivery                                                                                                          | Pre labour complication |
| O752  | Pyrexia during labour, not elsewhere classified                                                                                                       | Pre labour complication |
| O755  | Delayed delivery after artificial rupture of membranes                                                                                                | Pre labour complication |
| O756  | Delayed delivery after spontaneous or unspecified rupture of membranes                                                                                | Pre labour complication |
| O757  | Vaginal delivery following previous caesarean section                                                                                                 | Pre labour complication |
| O758  | Other specified complications of labour and delivery                                                                                                  | Pre labour complication |
| O82   | Single delivery by caesarean section                                                                                                                  | Pre labour complication |
| O871  | Deep phlebothrombosis in the puerperium                                                                                                               | Obstetric medical       |
| O878  | Other venous complications in the puerperium                                                                                                          | Obstetric medical       |
| O880  | Obstetric air embolism                                                                                                                                | Obstetric medical       |
| O882  | Obstetric blood clot embolism                                                                                                                         | Obstetric medical       |
| O888  | Other obstetric embolism                                                                                                                              | Obstetric medical       |
| O903  | Cardiomyopathy in the puerperium                                                                                                                      | Obstetric medical       |
| O9221 | Cracked nipple associated with childbirth, with mention of attachment difficulty                                                                      | Obstetric medical       |
| O982  | Gonorrhoea in pregnancy, childbirth and the puerperium                                                                                                | Obstetric medical       |
| O984  | Viral hepatitis in pregnancy, childbirth and the puerperium                                                                                           | Obstetric medical       |
| O989  | Unspecified maternal infectious or parasitic disease in pregnancy, childbirth and the puerperium                                                      | Obstetric medical       |
| O990  | Anaemia in pregnancy, childbirth and the puerperium                                                                                                   | Obstetric medical       |
| O9900 | Anaemia in pregnancy, childbirth and the puerperium, unspecified                                                                                      | Obstetric medical       |
| O9901 | Anaemia in pregnancy                                                                                                                                  | Obstetric medical       |
| O9902 | Anaemia in pregnancy, with mention of pre-existing anaemia                                                                                            | Obstetric medical       |
| O991  | Other diseases of the blood and blood-forming organs and certain disorders involving the immune mechanism in pregnancy, childbirth and the puerperium | Obstetric medical       |
| O992  | Endocrine, nutritional and metabolic diseases in pregnancy, childbirth and the puerperium                                                             | Obstetric medical       |
| O993  | Mental disorders and diseases of the nervous system in pregnancy, childbirth and the puerperium                                                       | Obstetric medical       |
| O9932 | Diseases of the nervous system in pregnancy, childbirth and the puerperium                                                                            | Obstetric medical       |



|               |                                                                                          |                   |
|---------------|------------------------------------------------------------------------------------------|-------------------|
| O994          | Diseases of the circulatory system in pregnancy, childbirth and the puerperium           | Obstetric medical |
| O995          | Diseases of the respiratory system in pregnancy, childbirth and the puerperium           | Obstetric medical |
| O996          | Diseases of the digestive system in pregnancy, childbirth and the puerperium             | Obstetric medical |
| O997          | Diseases of the skin and subcutaneous tissue in pregnancy, childbirth and the puerperium | Obstetric medical |
| O998          | Other specified diseases and conditions in pregnancy, childbirth and the puerperium      | Obstetric medical |
| Q (all codes) | Congenital malformations, deformations and chromosomal abnormalities                     | Fetal indications |
| R000          | Symptoms, signs and abnormal clinical and laboratory findings, not elsewhere classified  | Obstetric medical |
| R001          | Symptoms, signs and abnormal clinical and laboratory findings, not elsewhere classified  | Obstetric medical |
| R002          | Symptoms, signs and abnormal clinical and laboratory findings, not elsewhere classified  | Obstetric medical |
| R008          | Symptoms, signs and abnormal clinical and laboratory findings, not elsewhere classified  | Obstetric medical |
| R010          | Symptoms, signs and abnormal clinical and laboratory findings, not elsewhere classified  | Obstetric medical |
| R011          | Symptoms, signs and abnormal clinical and laboratory findings, not elsewhere classified  | Obstetric medical |
| R02           | Symptoms, signs and abnormal clinical and laboratory findings, not elsewhere classified  | Obstetric medical |
| R030          | Symptoms, signs and abnormal clinical and laboratory findings, not elsewhere classified  | Obstetric medical |
| R040          | Symptoms, signs and abnormal clinical and laboratory findings, not elsewhere classified  | Obstetric medical |
| R05           | Symptoms, signs and abnormal clinical and laboratory findings, not elsewhere classified  | Obstetric medical |
| R060          | Symptoms, signs and abnormal clinical and laboratory findings, not elsewhere classified  | Obstetric medical |

|      |                                                                                         |                   |
|------|-----------------------------------------------------------------------------------------|-------------------|
| R068 | Symptoms, signs and abnormal clinical and laboratory findings, not elsewhere classified | Obstetric medical |
| R073 | Symptoms, signs and abnormal clinical and laboratory findings, not elsewhere classified | Obstetric medical |
| R074 | Symptoms, signs and abnormal clinical and laboratory findings, not elsewhere classified | Obstetric medical |
| R098 | Symptoms, signs and abnormal clinical and laboratory findings, not elsewhere classified | Obstetric medical |
| R100 | Symptoms, signs and abnormal clinical and laboratory findings, not elsewhere classified | Obstetric medical |
| R101 | Symptoms, signs and abnormal clinical and laboratory findings, not elsewhere classified | Obstetric medical |
| R102 | Symptoms, signs and abnormal clinical and laboratory findings, not elsewhere classified | Obstetric medical |
| R103 | Symptoms, signs and abnormal clinical and laboratory findings, not elsewhere classified | Obstetric medical |
| R104 | Symptoms, signs and abnormal clinical and laboratory findings, not elsewhere classified | Obstetric medical |
| R11  | Symptoms, signs and abnormal clinical and laboratory findings, not elsewhere classified | Obstetric medical |
| R12  | Symptoms, signs and abnormal clinical and laboratory findings, not elsewhere classified | Obstetric medical |
| R202 | Symptoms, signs and abnormal clinical and laboratory findings, not elsewhere classified | Obstetric medical |
| R208 | Symptoms, signs and abnormal clinical and laboratory findings, not elsewhere classified | Obstetric medical |
| R21  | Symptoms, signs and abnormal clinical and laboratory findings, not elsewhere classified | Obstetric medical |
| R227 | Symptoms, signs and abnormal clinical and laboratory findings, not elsewhere classified | Obstetric medical |
| R252 | Symptoms, signs and abnormal clinical and laboratory findings, not elsewhere classified | Obstetric medical |

|       |                                                                                         |                   |
|-------|-----------------------------------------------------------------------------------------|-------------------|
| R262  | Symptoms, signs and abnormal clinical and laboratory findings, not elsewhere classified | Obstetric medical |
| R2989 | Symptoms, signs and abnormal clinical and laboratory findings, not elsewhere classified | Obstetric medical |
| R31   | Symptoms, signs and abnormal clinical and laboratory findings, not elsewhere classified | Obstetric medical |
| R32   | Symptoms, signs and abnormal clinical and laboratory findings, not elsewhere classified | Obstetric medical |
| R33   | Symptoms, signs and abnormal clinical and laboratory findings, not elsewhere classified | Obstetric medical |
| R34   | Symptoms, signs and abnormal clinical and laboratory findings, not elsewhere classified | Obstetric medical |
| R400  | Symptoms, signs and abnormal clinical and laboratory findings, not elsewhere classified | Obstetric medical |
| R42   | Symptoms, signs and abnormal clinical and laboratory findings, not elsewhere classified | Obstetric medical |
| R454  | Symptoms, signs and abnormal clinical and laboratory findings, not elsewhere classified | Obstetric medical |
| R456  | Symptoms, signs and abnormal clinical and laboratory findings, not elsewhere classified | Obstetric medical |
| R4581 | Symptoms, signs and abnormal clinical and laboratory findings, not elsewhere classified | Obstetric medical |
| R500  | Symptoms, signs and abnormal clinical and laboratory findings, not elsewhere classified | Obstetric medical |
| R509  | Symptoms, signs and abnormal clinical and laboratory findings, not elsewhere classified | Obstetric medical |
| R51   | Symptoms, signs and abnormal clinical and laboratory findings, not elsewhere classified | Obstetric medical |
| R522  | Symptoms, signs and abnormal clinical and laboratory findings, not elsewhere classified | Obstetric medical |
| R529  | Symptoms, signs and abnormal clinical and laboratory findings, not elsewhere classified | Obstetric medical |

|      |                                                                                         |                   |
|------|-----------------------------------------------------------------------------------------|-------------------|
| R53  | Symptoms, signs and abnormal clinical and laboratory findings, not elsewhere classified | Obstetric medical |
| R55  | Symptoms, signs and abnormal clinical and laboratory findings, not elsewhere classified | Obstetric medical |
| R568 | Symptoms, signs and abnormal clinical and laboratory findings, not elsewhere classified | Obstetric medical |
| R600 | Symptoms, signs and abnormal clinical and laboratory findings, not elsewhere classified | Obstetric medical |
| R609 | Symptoms, signs and abnormal clinical and laboratory findings, not elsewhere classified | Obstetric medical |
| R634 | Symptoms, signs and abnormal clinical and laboratory findings, not elsewhere classified | Obstetric medical |
| R700 | Symptoms, signs and abnormal clinical and laboratory findings, not elsewhere classified | Obstetric medical |
| R739 | Symptoms, signs and abnormal clinical and laboratory findings, not elsewhere classified | Obstetric medical |
| R748 | Symptoms, signs and abnormal clinical and laboratory findings, not elsewhere classified | Obstetric medical |
| R778 | Symptoms, signs and abnormal clinical and laboratory findings, not elsewhere classified | Obstetric medical |
| R779 | Symptoms, signs and abnormal clinical and laboratory findings, not elsewhere classified | Obstetric medical |
| R790 | Symptoms, signs and abnormal clinical and laboratory findings, not elsewhere classified | Obstetric medical |
| R798 | Symptoms, signs and abnormal clinical and laboratory findings, not elsewhere classified | Obstetric medical |
| R80  | Symptoms, signs and abnormal clinical and laboratory findings, not elsewhere classified | Obstetric medical |
| R81  | Symptoms, signs and abnormal clinical and laboratory findings, not elsewhere classified | Obstetric medical |
| R829 | Symptoms, signs and abnormal clinical and laboratory findings, not elsewhere classified | Obstetric medical |

|               |                                                                                         |                       |
|---------------|-----------------------------------------------------------------------------------------|-----------------------|
| R899          | Symptoms, signs and abnormal clinical and laboratory findings, not elsewhere classified | Obstetric medical     |
| R943          | Symptoms, signs and abnormal clinical and laboratory findings, not elsewhere classified | Obstetric medical     |
| R944          | Symptoms, signs and abnormal clinical and laboratory findings, not elsewhere classified | Obstetric medical     |
| R945          | Symptoms, signs and abnormal clinical and laboratory findings, not elsewhere classified | Obstetric medical     |
| S (all codes) | Injury, poisoning and certain other consequences of external causes                     | Non obstetric medical |
| T (all codes) | Injury, poisoning and certain other consequences of external causes                     | Non obstetric medical |
| U91           | Syndrome not elsewhere classified                                                       | Non obstetric medical |
| Z028          | Other examinations for administrative purposes                                          | Non obstetric medical |
| Z035          | Observation for other suspected cardiovascular diseases                                 | Non obstetric medical |
| Z038          | Observation for other suspected diseases and conditions                                 | Non obstetric medical |
| Z040          | Blood-alcohol and blood-drug test                                                       | Non obstetric medical |
| Z043          | Examination and observation following other accident                                    | Non obstetric medical |
| Z048          | Examination and observation for other specified reasons                                 | Non obstetric medical |
| Z0632         | Agent resistant to penicillin and related antibiotics, Methicillin resistant agent      | Non obstetric medical |
| Z208          | Contact with and exposure to other communicable diseases                                | Non obstetric medical |
| Z209          | Contact with and exposure to unspecified communicable disease                           | Non obstetric medical |
| Z223          | Carrier of other specified bacterial diseases                                           | Non obstetric medical |
| Z2251         | Carrier of viral hepatitis B                                                            | Non obstetric medical |
| Z2252         | Carrier of viral hepatitis C                                                            | Non obstetric medical |
| Z238          | Need for immunisation against other single bacterial diseases                           | Non obstetric medical |
| Z240          | Need for immunisation against poliomyelitis                                             | Non obstetric medical |
| Z268          | Need for immunisation against other specified single infectious diseases                | Non obstetric medical |
| Z290          | Isolation                                                                               | Non obstetric medical |
| Z292          | Prophylactic pharmacotherapy                                                            | Non obstetric medical |
| Z312          | In vitro fertilisation                                                                  | Obstetric medical     |
| Z340          | Supervision of normal first pregnancy                                                   | Elective              |
| Z348          | Supervision of other normal pregnancy                                                   | Elective              |
| Z349          | Supervision of normal pregnancy, unspecified                                            | Elective              |

|       |                                                                                           |                         |
|-------|-------------------------------------------------------------------------------------------|-------------------------|
| Z350  | Supervision of pregnancy with history of infertility                                      | Elective                |
| Z351  | Supervision of pregnancy with history of abortive outcome                                 | Obstetric medical       |
| Z352  | Supervsn preg w oth poor obst history                                                     | Obstetric medical       |
| Z353  | Supervsn preg w h/o insuff A/N care                                                       | Obstetric medical       |
| Z354  | Supervsn preg w grand multiparity                                                         | Obstetric medical       |
| Z355  | Supervsn of preg w advanced mat age                                                       | Advanced maternal age   |
| Z3551 | Supervision of primigravida with advanced maternal age                                    | Advanced maternal age   |
| Z3552 | Supervision of multigravida with advanced maternal age                                    | Advanced maternal age   |
| Z356  | Supervision of (very) young primigravida                                                  | Obstetric medical       |
| Z358  | Supervision of other high-risk pregnancies                                                | Obstetric medical       |
| Z359  | Supervision of high-risk pregnancy, unspecified                                           | Obstetric medical       |
| Z362  | Other antenatal screening based on amniocentesis                                          | Obstetric medical       |
| Z368  | Other antenatal screening                                                                 | Obstetric medical       |
| Z385  | Twin, unspecified as to place of birth                                                    | Pre labour complication |
| Z392  | Routine postpartum follow-up                                                              | Obstetric medical       |
| Z428  | Follow-up care involving plastic surgery of other body part                               | Non obstetric medical   |
| Z438  | Attention to other artificial openings                                                    | Non obstetric medical   |
| Z466  | Fitting and adjustment of urinary device                                                  | Non obstetric medical   |
| Z480  | Attention to surgical dressings and sutures                                               | Non obstetric medical   |
| Z5188 | Other specified medical care                                                              | Non obstetric medical   |
| Z5200 | Whole blood donor                                                                         | Non obstetric medical   |
| Z532  | Procedure not carried out because of patient's decision for other and unspecified reasons | Non obstetric medical   |
| Z588  | Other problems related to education and literacy                                          | Psychosocial            |
| Z591  | Inadequate housing                                                                        | Psychosocial            |
| Z598  | Other problems related to housing and economic circumstances                              | Psychosocial            |
| Z634  | Disappearance and death of family member                                                  | Psychosocial            |
| Z6379 | Other stressful life events affecting family and household                                | Psychosocial            |
| Z638  | Other specified problems related to primary support group                                 | Psychosocial            |
| Z641  | Problems related to multiparity                                                           | Psychosocial            |
| Z651  | Imprisonment and other incarceration                                                      | Psychosocial            |
| Z653  | Problems related to other legal circumstances                                             | Psychosocial            |
| Z720  | Tobacco use, current                                                                      | Psychosocial            |

|       |                                                                                                                         |                       |
|-------|-------------------------------------------------------------------------------------------------------------------------|-----------------------|
| Z722  | Drug use                                                                                                                | Psychosocial          |
| Z735  | Social role conflict, not elsewhere classified                                                                          | Psychosocial          |
| Z739  | Problem related to life-management difficulty, unspecified                                                              | Psychosocial          |
| Z740  | Need for assistance due to reduced mobility                                                                             | Psychosocial          |
| Z748  | Other problems related to care-provider dependency                                                                      | Psychosocial          |
| Z752  | Other waiting period for investigation and treatment                                                                    | Psychosocial          |
| Z753  | Unavailability and inaccessibility of healthcare facilities                                                             | Psychosocial          |
| Z758  | Other problems related to medical facilities and other health care                                                      | Psychosocial          |
| Z768  | Persons encountering health services in other specified circumstances                                                   | Psychosocial          |
| Z824  | Family history of ischaemic heart disease and other diseases of the circulatory system                                  | Non obstetric medical |
| Z827  | Family history of congenital malformations, deformations and chromosomal abnormalities                                  | Non obstetric medical |
| Z832  | Family history of diseases of the blood and blood-forming organs and certain disorders involving the immune mechanism   | Non obstetric medical |
| Z848  | Family history of other specified conditions                                                                            | Non obstetric medical |
| Z850  | Personal history of malignant neoplasm of digestive organs                                                              | Non obstetric medical |
| Z852  | Personal history of malignant neoplasm of other respiratory and intrathoracic organs                                    | Non obstetric medical |
| Z857  | Personal history of other malignant neoplasms of lymphoid, haematopoietic and related tissues                           | Non obstetric medical |
| Z858  | Personal history of malignant neoplasms of other organs and systems                                                     | Non obstetric medical |
| Z860  | Personal history of other neoplasms                                                                                     | Non obstetric medical |
| Z8610 | Personal history of unspecified infectious and parasitic disease                                                        | Non obstetric medical |
| Z8618 | Personal history of other infectious and parasitic disease                                                              | Non obstetric medical |
| Z862  | Personal history of diseases of the blood and blood-forming organs and certain disorders involving the immune mechanism | Non obstetric medical |
| Z863  | Personal history of endocrine, nutritional and metabolic diseases                                                       | Non obstetric medical |
| Z8642 | Personal history of drug use disorder                                                                                   | Non obstetric medical |
| Z8643 | Personal history of tobacco use disorder                                                                                | Non obstetric medical |
| Z865  | Personal history of other mental and behavioural disorders                                                              | Non obstetric medical |
| Z866  | Personal history of diseases of the nervous system and sense organs                                                     | Non obstetric medical |

|       |                                                                                               |                       |
|-------|-----------------------------------------------------------------------------------------------|-----------------------|
| Z8669 | Personal history of diseases of the nervous system and sense organs, not elsewhere classified | Non obstetric medical |
| Z867  | Personal history of diseases of the circulatory system                                        | Non obstetric medical |
| Z8672 | Personal history of thrombosis and embolism                                                   | Non obstetric medical |
| Z8679 | Personal history of diseases of the circulatory system, not elsewhere classified              | Non obstetric medical |
| Z870  | Personal history of diseases of the respiratory system                                        | Non obstetric medical |
| Z8710 | Personal history of unspecified digestive disease                                             | Non obstetric medical |
| Z8718 | Personal history of other digestive system disease                                            | Non obstetric medical |
| Z872  | Personal history of diseases of the skin and subcutaneous tissue                              | Non obstetric medical |
| Z873  | Personal history of diseases of the musculoskeletal system and connective tissue              | Non obstetric medical |
| Z874  | Personal history of diseases of the genitourinary system                                      | Non obstetric medical |
| Z875  | Personal history of complications of pregnancy, childbirth and the puerperium                 | Non obstetric medical |
| Z876  | Personal history of certain conditions arising in the perinatal period                        | Non obstetric medical |
| Z877  | Personal history of congenital malformations, deformations and chromosomal abnormalities      | Non obstetric medical |
| Z878  | Personal history of other specified conditions                                                | Non obstetric medical |
| Z901  | Acquired absence of breast(s)                                                                 | Non obstetric medical |
| Z915  | Personal history of self-harm                                                                 | Non obstetric medical |
| Z916  | Personal history of other physical trauma                                                     | Non obstetric medical |
| Z918  | Personal history of other specified risk-factors, not elsewhere classified                    | Non obstetric medical |
| Z920  | Personal history of contraception                                                             | Non obstetric medical |
| Z921  | Personal history of long term (current) use of anticoagulants                                 | Non obstetric medical |
| Z9228 | Personal history of long-term [current] use of other medicaments                              | Non obstetric medical |
| Z924  | Personal history of major surgery, not elsewhere classified                                   | Non obstetric medical |
| Z928  | Personal history of other medical treatment                                                   | Non obstetric medical |
| Z940  | Kidney transplant status                                                                      | Non obstetric medical |
| Z945  | Skin transplant status                                                                        | Non obstetric medical |
| Z950  | Presence of cardiac device                                                                    | Non obstetric medical |
| Z952  | Presence of prosthetic heart valve                                                            | Non obstetric medical |
| Z960  | Presence of urogenital implants                                                               | Non obstetric medical |



|       |                                     |                       |
|-------|-------------------------------------|-----------------------|
| Z9664 | Presence of hip implant             | Non obstetric medical |
| Z978  | Presence of other specified devices | Non obstetric medical |
| Z981  | Arthrodesis status                  | Non obstetric medical |
